# Supplementary material for: Viunalikeviruses are environmentally common agents of horizontal gene transfer in pathogens and biocontrol bacteria
Source: PubMed Central journal article supplement — ISME J. 2014 Aug 12;8(10):2143–7. doi: 10.1038/ismej.2014.150 (PMC4184006; doi:10.1038/ismej.2014.150), 2014-08-12
Supplement: ismej2014150x1.pdf [file ismej2014150x1.pdf]

## **Supplementary Information**

### **Viunalikeviruses are environmentally common agents of horizontal gene transfer in pathogens and biocontrol bacteria**

Miguel A. Matilla<sup>1</sup>, Xinzhe Fang<sup>1</sup>, and George P.C. Salmond<sup>1\*</sup>

<sup>1</sup>From the Department of Biochemistry, University of Cambridge, Tennis Court Road, Cambridge, UK, CB2 1QW

\*To whom correspondence should be addressed: George P.C. Salmond, Department of Biochemistry, University of Cambridge, Tennis Court Road, Cambridge, UK, CB2 1QW. Tel: +44 (0)1223 333650; Fax: +44 (0)1223 766108; E-mail: [gpcs2@cam.ac.uk](mailto:gpcs2@cam.ac.uk)

**Supplementary Table S1: Frequency of transduction of different markers using the *Salmonella* phage Vi1**

| Donor strain | Relevant marker/plasmid  | Recipient strain | m.o.i. | Transduction efficiency <sup>a,b,c</sup> | Standard deviation <sup>b</sup> |
|--------------|--------------------------|------------------|--------|------------------------------------------|---------------------------------|
| BDR948       | pECA1039-Km3             | BDR948           | 10     | $<1.0 \times 10^{-10}$                   | -                               |
|              | pECA1039-Km3             | BDR948           | 1      | $3.7 \times 10^{-7}$                     | $7.7 \times 10^{-8}$            |
|              | pECA1039-Km3             | BDR948           | 0.1    | $1.3 \times 10^{-5}$                     | $1.1 \times 10^{-6}$            |
|              | pECA1039-Km3             | BDR948           | 0.01   | $2.3 \times 10^{-5}$                     | $2.5 \times 10^{-6}$            |
| SW114        | <i>STY1890-1891::cat</i> | BDR948           | 10     | $<1.0 \times 10^{-10}$                   | -                               |
|              | <i>STY1890-1891::cat</i> | BDR948           | 1      | $1.1 \times 10^{-7}$                     | $8.8 \times 10^{-9}$            |
|              | <i>STY1890-1891::cat</i> | BDR948           | 0.1    | $5.6 \times 10^{-6}$                     | $7.1 \times 10^{-7}$            |
|              | <i>STY1890-1891::cat</i> | BDR948           | 0.01   | $1.2 \times 10^{-5}$                     | $3.5 \times 10^{-6}$            |
| BA231        | <i>STY3632::cat</i>      | BDR948           | 10     | $<1.0 \times 10^{-10}$                   | -                               |
|              | <i>STY3632::cat</i>      | BDR948           | 1      | $4.5 \times 10^{-8}$                     | $5.7 \times 10^{-8}$            |
|              | <i>STY3632::cat</i>      | BDR948           | 0.1    | $5.2 \times 10^{-6}$                     | $2.8 \times 10^{-7}$            |
|              | <i>STY3632::cat</i>      | BDR948           | 0.01   | $4.6 \times 10^{-5}$                     | $8.1 \times 10^{-6}$            |

<sup>a</sup>Transduction efficiency is expressed as the number of transductants per plaque forming unit (p.f.u.)

<sup>b</sup>Mean and standard deviation of three independent experiments are shown.

<sup>c</sup>Transduction experiments were performed using  $10^9$  bacterial cells.

**Supplementary Table S2. Phages, bacteria, oomycete, and plasmids used in this study**

| Phage/Bacteria/oomycete/plasmids  | Genotype or relevant characteristic <sup>a</sup>                                                                                                                                | Reference or source                 |
|-----------------------------------|---------------------------------------------------------------------------------------------------------------------------------------------------------------------------------|-------------------------------------|
| <b>Phages</b>                     |                                                                                                                                                                                 |                                     |
| ViI                               | <i>Salmonella</i> Typhi infecting phage                                                                                                                                         | Pickard <i>et al.</i> , (2010)      |
| LIMEstone1                        | <i>Dickeya solani</i> infecting phage                                                                                                                                           | Adriaenssens <i>et al.</i> , (2012) |
| LIMEstone2                        | <i>Dickeya solani</i> infecting phage                                                                                                                                           | Adriaenssens <i>et al.</i> , (2012) |
| CBA120                            | <i>Escherichia coli</i> O157:H7 infecting phage                                                                                                                                 | Kutter <i>et al.</i> , (2011)       |
| φXF1                              | <i>Dickeya solani</i> infecting phage                                                                                                                                           | This study                          |
| φXF3                              | <i>Dickeya solani</i> infecting phage                                                                                                                                           | This study                          |
| φXF4                              | <i>Dickeya solani</i> infecting phage                                                                                                                                           | This study                          |
| φXF28                             | <i>Dickeya solani</i> infecting phage                                                                                                                                           | This study                          |
| <b>Bacteria strains</b>           |                                                                                                                                                                                 |                                     |
| <i>Salmonella</i> Typhi BRD948    | ViI host strain; Ty2 $\Delta$ aroC aroD htrA; Wild type “vaccine strain”                                                                                                        | Bishop <i>et al.</i> , (2008)       |
| <i>Salmonella</i> Typhi SW114     | BDR948 mutant <i>STY1890-1891::cat</i> ; Cm <sup>r</sup>                                                                                                                        | D. Pickard                          |
| <i>Salmonella</i> Typhi SW231     | BDR948 mutant <i>STY3632::cat</i> ; Cm <sup>r</sup>                                                                                                                             | D. Pickard                          |
| <i>Escherichia coli</i> β2163     | F <sup>-</sup> RP4-2-Tc::Mu $\Delta$ dapA::( <i>erm-pir</i> ), Km <sup>r</sup> Em <sup>r</sup>                                                                                  | Demarre <i>et al.</i> , (2005)      |
| <i>E. coli</i> O157:H7 NCTC 12900 | CBA120 host strain; The strain lacks the shiga-toxin (Stx) genes; Km <sup>r</sup>                                                                                               | ATCC 700728                         |
| <i>Dickeya solani</i> MK10        | Wild type strain isolated from potato in Israel; LIMEstone phage host strain                                                                                                    | Pritchard <i>et al.</i> , (2013)    |
| MK10P1                            | MK10 transposon mutant defective in secreted protease C precursor <i>spp::Tn-KRCPN1</i> ; Protease-negative, Km <sup>r</sup>                                                    | This study                          |
| MK10P7                            | MK10 transposon mutant defective in alkaline protease inhibitor precursor <i>api::Tn-KRCPN1</i> ; Protease-negative, Km <sup>r</sup>                                            | This study                          |
| MK1610P1                          | MK10 transposon mutant defective in secreted protease C precursor <i>spp::mini-Tn5Sm/Sp</i> ; Transduced from MK16P1 using LIMEstone phages; Protease-negative, Sm <sup>r</sup> | This study                          |
| MK10MM1                           | MK10 transposon mutant defective in 3-isopropylmalate dehydratase (large subunit) <i>ipd::Tn-KRCPN1</i> ; auxotrophic, Km <sup>r</sup>                                          | This study                          |
| MK10MM2                           | MK10 transposon mutant defective in glutamate synthase (large subunit) <i>gts::mini-Tn5Sm/Sp</i> ; auxotrophic, Sm <sup>r</sup>                                                 | This study                          |
| MK10oocF                          | MK10 transposon mutant <i>oocF::Tn-KRCPN1</i> ; oocydin A negative, Km <sup>r</sup>                                                                                             | This study                          |
| MK10oocN                          | MK10 transposon mutant <i>oocN::Tn-KRCPN1</i> ; oocydin A negative, Km <sup>r</sup>                                                                                             | This study                          |
| <i>Dickeya solani</i> MK16        | Wild type strain isolated from river water in the United Kingdom; LIMEstone phage host strain                                                                                   | Pritchard <i>et al.</i> , (2013)    |
| MK16P1                            | MK16 transposon mutant defective in secreted protease C precursor <i>spp::mini-Tn5Sm/Sp</i> ; Protease-negative, Sm <sup>r</sup>                                                | This study                          |
| MK16P2                            | MK16 transposon insertion in promoter region of gene for secreted protease C precursor <i>spp::mini-Tn5Sm/Sp</i> ; Protease-negative, Sm <sup>r</sup>                           | This study                          |
| MK16MM1                           | MK16 transposon mutant defective in dihydroorotate dehydrogenase <i>dhd::mini-Tn5Sm/Sp</i> ; auxotrophic, Sm <sup>r</sup>                                                       | This study                          |
| MK16MM3                           | MK16 transposon mutant defective in anthranilate phosphoribosyltransferase <i>apr::mini-Tn5Sm/Sp</i> ; auxotrophic, Sm <sup>r</sup>                                             | This study                          |
| MK16MM4                           | MK16 transposon mutant defective in nitrite/sulfite reductase (beta-component) <i>nsr::mini-Tn5Sm/Sp</i> ; auxotrophic, Sm <sup>r</sup>                                         | This study                          |
| MK16MM5                           | MK16 transposon mutant defective in phosphoribosylaminoimidazole carboxylase <i>ppc::mini-Tn5Sm/Sp</i> ; auxotrophic, Sm <sup>r</sup>                                           | This study                          |
| MK1016P1                          | MK16 transposon mutant defective in secreted protease C precursor <i>spp::Tn-KRCPN1</i> ; Transduced from MK10P1 using LIMEstone phages; Protease-negative, Km <sup>r</sup>     | This study                          |
| 1016MM2                           | MK16 transposon mutant defective in glutamate synthase (large subunit) <i>gts::mini-Tn5Sm/Sp</i> ; Transduced from MK10MM2 using LIMEstone phages; auxotrophic, Sm <sup>r</sup> | This study                          |
| MK16oocF                          | MK16 transposon mutant <i>oocF::Tn-KRCPN1</i> ; Transduced from MK10oocF using LIMEstone phages; oocydin A negative, Km <sup>r</sup>                                            | This study                          |
| MK16oocN                          | MK16 transposon mutant <i>oocN::Tn-KRCPN1</i> ; Transduced from MK10oocN using LIMEstone phages; oocydin A negative, Km <sup>r</sup>                                            | This study                          |
| <i>Dickeya solani</i> IPO 2222    | Wild type strain isolated from potato in the Netherlands; LIMEstone host strain                                                                                                 | Pritchard <i>et al.</i> , (2013)    |
| 10IPOP1                           | IPO 2222 transposon mutant defective in secreted protease C precursor <i>spp::Tn-KRCPN1</i> ; Transduced from MK10P1 using LIMEstone phages; Protease-negative, Km <sup>r</sup> | This study                          |

|                                |                                                                                                                                                                                                       |                                                 |
|--------------------------------|-------------------------------------------------------------------------------------------------------------------------------------------------------------------------------------------------------|-------------------------------------------------|
| IPOoocF                        | IPO 2222 transposon mutant <i>oocF::Tn-KRCPN1</i> ; Transduced from MK10oocF using LIMEstone phages; oocydin A negative, Km <sup>r</sup>                                                              | This study                                      |
| IPOoocN                        | IPO 2222 transposon mutant <i>oocN::Tn-KRCPN1</i> ; Transduced from MK10oocN using LIMEstone phages; oocydin A negative, Km <sup>r</sup>                                                              | This study                                      |
| <b><u>Oomycete strains</u></b> |                                                                                                                                                                                                       |                                                 |
| <i>Pythium ultimum</i>         | Wild type, plant pathogen                                                                                                                                                                             | R. Cooper                                       |
| <b><u>Plasmids</u></b>         |                                                                                                                                                                                                       |                                                 |
| pKRCPN1                        | Km <sup>r</sup> , Tc <sup>r</sup> ; Derivative of pDS1028 <i>uidA</i> with the <i>uidA</i> and <i>cat</i> genes replaced with <i>lacZ</i> and <i>km</i> genes. Plasmid used in transposon mutagenesis | K.J. Roberts (2010)                             |
| pUTmini-Tn5Sm/Sp               | Ap <sup>r</sup> , Sm <sup>r</sup> , Sp <sup>r</sup> ; Delivery plasmid for mini-Tn5Sm/Sp; Plasmid used in transposon mutagenesis                                                                      | De Lorenzo <i>et al.</i> , (1990)               |
| pACYC184                       | Cm <sup>r</sup> , Tc <sup>r</sup> ; Plasmid cloning vector                                                                                                                                            | Chang and Cohen (1978)                          |
| pECA1039-Km3                   | Km <sup>r</sup> ; Transposon-marked derivative of the original ToxIN plasmid, pECA1039, from <i>Pectobacterium atrosepticum</i>                                                                       | Fineran <i>et al.</i> , (2009)                  |
| pFR2                           | Ap <sup>r</sup> ; pBR322 containing the full <i>tenpin</i> locus from <i>Photorhabdus luminescens</i> TT01                                                                                            | Blower <i>et al.</i> , (2012)                   |
| p34S-Km3                       | Km <sup>r</sup> , Ap <sup>r</sup> <i>km3</i> antibiotic resistance cassette                                                                                                                           | Dennis and Zylstra (1998)                       |
| pMAMV116                       | Km <sup>r</sup> ; 0.99-kb PstI fragment containing <i>km3</i> cassette of p34S-Km3 was inserted into PstI site of <i>amp</i> resistance gene in pFR2                                                  | Matilla and Salmond (submitted for publication) |
| pTA46                          | Ap <sup>r</sup> ; pBR322 containing the full toxin locus from <i>Pectobacterium atrosepticum</i>                                                                                                      | Fineran <i>et al.</i> , (2009)                  |
| pMAMV114                       | Km <sup>r</sup> ; 0.99-kb PstI fragment containing <i>km3</i> antibiotic resistance cassette of p34S-Km3 inserted into PstI site of <i>amp</i> resistance gene in pTA46                               | Matilla and Salmond (submitted for publication) |

<sup>a</sup>Ap, ampicillin; Km, kanamycin; Cm, chloramphenicol; Sm, streptomycin; Sp, spectinomycin; Tc, tetracycline; Em, erythromycin; ATCC, American Type Culture Collection.

### Supplementary Table S3: Oligonucleotide PCR primers used in this study

| Name         | Sequence (5'-3')                    | Note                             |
|--------------|-------------------------------------|----------------------------------|
| PF106        | GACCACACGTCGACTAGTGCNNNNNNNNNNAGAG  | Random primed PCR primer 1       |
| PF107        | GACCACACGTCGACTAGTGCNNNNNNNNNNACGCC | Random primed PCR primer 2       |
| PF108        | GACCACACGTCGACTAGTGCNNNNNNNNNNGATAC | Random primed PCR primer 3       |
| PF109        | GACCACACGTCGACTAGTGC                | Random primed PCR adapter primer |
| MAMV1-KRCPN1 | GGAATTGATCCGGTGGATG                 | TnKRCPN1 specific primer         |
| MAMV2-KRCPN1 | GCATAAAGCTTGCTCAATCAATCAC           | TnKRCPN1 specific primer         |
| MAMV3-Sm/Sp  | CTAAGCTGATCCGGTGGATG                | mini-Tn5Sm/Sp specific primer    |
| MAMV4-Sm/Sp  | AACGGTTTACAAGCATAAAGC               | mini-Tn5Sm/Sp specific primer    |
| MJ7          | TTTTGAATTCGTTTTATCGACATTGTGAACC     | pECA1039-Km3 specific primer     |
| KD02         | TTTTAAGCTTTTACGATCTTCAGTATGGG       | pECA1039-Km3 specific primer     |
| pTRB58       | TGATGTCGGCGATATAGG                  | pACYC184 specific primer         |
| pTRB59       | AGAGATTACGCGCAGACC                  | pACYC184 specific primer         |

**Supplementary Table S4: Transduction efficiencies of LIMEstone phages within and between *Dickeya solani* strains.**

| Donor strain                                          | Relevant marker/plasmid      | Recipient strain | Phenotype              | Transduction efficiency LS1 <sup>a,b,c</sup> | Standard deviation <sup>b</sup> | Transduction efficiency LS2 <sup>a,b,c</sup> | Standard deviation <sup>b</sup> |
|-------------------------------------------------------|------------------------------|------------------|------------------------|----------------------------------------------|---------------------------------|----------------------------------------------|---------------------------------|
| <b>Transduction within <i>Dickeya solani</i> MK10</b> |                              |                  |                        |                                              |                                 |                                              |                                 |
| MK10P1                                                | <i>spp::Km</i>               | MK10             | Protease <sup>-</sup>  | 5.1 x 10 <sup>-5</sup>                       | 1.4 x 10 <sup>-7</sup>          | 5.5 x 10 <sup>-5</sup>                       | 4.2 x 10 <sup>-6</sup>          |
| MK10P7                                                | <i>api::Km</i>               | MK10             | Protease <sup>-</sup>  | 6.1 x 10 <sup>-5</sup>                       | 9.2 x 10 <sup>-6</sup>          | 7.6 x 10 <sup>-5</sup>                       | 1.8 x 10 <sup>-5</sup>          |
| MK10MM1                                               | <i>ipd::Km</i>               | MK10             | Auxotrophy             | 6.3 x 10 <sup>-5</sup>                       | 3.4 x 10 <sup>-6</sup>          | 6.2 x 10 <sup>-5</sup>                       | 9.9 x 10 <sup>-7</sup>          |
| MK10MM2                                               | <i>gts::Sm</i>               | MK10             | Auxotrophy             | 1.2 x 10 <sup>-5</sup>                       | 1.0 x 10 <sup>-6</sup>          | 1.7 x 10 <sup>-5</sup>                       | 3.2 x 10 <sup>-6</sup>          |
| MK10oocF                                              | <i>oocF::Km</i>              | MK10             | Oocydin A <sup>-</sup> | 2.5 x 10 <sup>-5</sup>                       | 2.5 x 10 <sup>-6</sup>          | 3.5 x 10 <sup>-5</sup>                       | 1.7 x 10 <sup>-6</sup>          |
| MK10oocN                                              | <i>oocN::Km</i>              | MK10             | Oocydin A <sup>-</sup> | 3.5 x 10 <sup>-5</sup>                       | 7.5 x 10 <sup>-7</sup>          | 3.3 x 10 <sup>-5</sup>                       | 1.3 x 10 <sup>-6</sup>          |
| MK10                                                  | pECA1039-km3                 | MK10             | ToxIN <sup>+</sup>     | 5.1 x 10 <sup>-5</sup>                       | 9.8 x 10 <sup>-6</sup>          | 4.7 x 10 <sup>-5</sup>                       | 4.0 x 10 <sup>-6</sup>          |
| <b>Transduction within <i>Dickeya solani</i> MK16</b> |                              |                  |                        |                                              |                                 |                                              |                                 |
| MK16P1                                                | <i>spp::Sm</i>               | MK16             | Protease <sup>-</sup>  | 2.2 x 10 <sup>-5</sup>                       | 1.2 x 10 <sup>-6</sup>          | 2.8 x 10 <sup>-5</sup>                       | 3.5 x 10 <sup>-7</sup>          |
| MK16P2                                                | P <sub><i>spp</i></sub> ::Sm | MK16             | Protease <sup>-</sup>  | 2.5 x 10 <sup>-5</sup>                       | 2.1 x 10 <sup>-6</sup>          | 3.2 x 10 <sup>-5</sup>                       | 4.2 x 10 <sup>-6</sup>          |
| MK16MM1                                               | <i>dhd::Sm</i>               | MK16             | Auxotrophy             | 1.9 x 10 <sup>-5</sup>                       | 3.1 x 10 <sup>-6</sup>          | 2.9 x 10 <sup>-5</sup>                       | 3.3 x 10 <sup>-6</sup>          |
| MK16MM3                                               | <i>apr::Sm</i>               | MK16             | Auxotrophy             | 1.0 x 10 <sup>-5</sup>                       | 6.6 x 10 <sup>-7</sup>          | 9.1 x 10 <sup>-6</sup>                       | 1.3 x 10 <sup>-6</sup>          |
| MK16MM4                                               | <i>nsr::Sm</i>               | MK16             | Auxotrophy             | 1.7 x 10 <sup>-5</sup>                       | 7.1 x 10 <sup>-7</sup>          | 1.7 x 10 <sup>-5</sup>                       | 1.8 x 10 <sup>-6</sup>          |
| MK16MM5                                               | <i>ppc::Sm</i>               | MK16             | Auxotrophy             | 1.8 x 10 <sup>-5</sup>                       | 2.4 x 10 <sup>-6</sup>          | 2.3 x 10 <sup>-5</sup>                       | 1.9 x 10 <sup>-6</sup>          |
| MK16                                                  | pECA1039-km3                 | MK16             | ToxIN <sup>+</sup>     | 4.1 x 10 <sup>-5</sup>                       | 3.5 x 10 <sup>-7</sup>          | 4.4 x 10 <sup>-5</sup>                       | 3.4 x 10 <sup>-6</sup>          |
| <b>Interstrain transduction</b>                       |                              |                  |                        |                                              |                                 |                                              |                                 |
| MK10P1                                                | <i>spp::Km</i>               | MK16             | Protease <sup>-</sup>  | 1.7 x 10 <sup>-5</sup>                       | 4.2 x 10 <sup>-7</sup>          | 3.3 x 10 <sup>-5</sup>                       | 4.3 x 10 <sup>-6</sup>          |
| MK10P1                                                | <i>spp::Km</i>               | IPO 2222         | Protease <sup>-</sup>  | 1.5 x 10 <sup>-5</sup>                       | 5.7 x 10 <sup>-7</sup>          | 1.2 x 10 <sup>-5</sup>                       | 6.4 x 10 <sup>-6</sup>          |
| MK10MM2                                               | <i>gts::Sm</i>               | MK16             | Auxotrophy             | 9.6 x 10 <sup>-6</sup>                       | 1.1 x 10 <sup>-6</sup>          | 1.2 x 10 <sup>-5</sup>                       | 1.3 x 10 <sup>-6</sup>          |
| MK10oocF                                              | <i>oocF::Km</i>              | MK16             | Oocydin A <sup>-</sup> | 9.3 x 10 <sup>-6</sup>                       | 1.8 x 10 <sup>-6</sup>          | 1.1 x 10 <sup>-5</sup>                       | 1.4 x 10 <sup>-6</sup>          |
| MK10oocF                                              | <i>oocF::Km</i>              | IPO 2222         | Oocydin A <sup>-</sup> | 1.1 x 10 <sup>-5</sup>                       | 1.6 x 10 <sup>-6</sup>          | 1.4 x 10 <sup>-5</sup>                       | 2.3 x 10 <sup>-6</sup>          |
| MK10oocN                                              | <i>oocN::Km</i>              | MK16             | Oocydin A <sup>-</sup> | 1.5 x 10 <sup>-5</sup>                       | 1.9 x 10 <sup>-7</sup>          | 1.2 x 10 <sup>-5</sup>                       | 1.5 x 10 <sup>-6</sup>          |
| MK10oocN                                              | <i>oocN::Km</i>              | IPO 2222         | Oocydin A <sup>-</sup> | 1.6 x 10 <sup>-5</sup>                       | 4.7 x 10 <sup>-6</sup>          | 1.4 x 10 <sup>-5</sup>                       | 8.5 x 10 <sup>-7</sup>          |
| MK10                                                  | pECA1039-km3                 | MK16             | ToxIN <sup>+</sup>     | 2.4 x 10 <sup>-5</sup>                       | 1.1 x 10 <sup>-6</sup>          | 2.3 x 10 <sup>-5</sup>                       | 2.8 x 10 <sup>-6</sup>          |
| MK10                                                  | pECA1039-km3                 | IPO 2222         | ToxIN <sup>+</sup>     | 1.5 x 10 <sup>-5</sup>                       | 8.5 x 10 <sup>-7</sup>          | 1.3 x 10 <sup>-5</sup>                       | 1.3 x 10 <sup>-6</sup>          |
| MK16P1                                                | <i>spp::Sm</i>               | MK10             | Protease <sup>-</sup>  | 3.9 x 10 <sup>-5</sup>                       | 9.9 x 10 <sup>-7</sup>          | 3.7 x 10 <sup>-5</sup>                       | 1.3 x 10 <sup>-6</sup>          |
| MK16                                                  | pECA1039-km3                 | MK10             | ToxIN <sup>+</sup>     | 7.0 x 10 <sup>-5</sup>                       | 9.5 x 10 <sup>-6</sup>          | 6.6 x 10 <sup>-5</sup>                       | 3.0 x 10 <sup>-6</sup>          |
| MK16                                                  | pECA1039-km3                 | IPO 2222         | ToxIN <sup>+</sup>     | 4.3 x 10 <sup>-5</sup>                       | 2.2 x 10 <sup>-6</sup>          | 4.1 x 10 <sup>-5</sup>                       | 4.5 x 10 <sup>-6</sup>          |

<sup>a</sup>Transduction efficiency is expressed as the number of transductants per plaque forming unit (p.f.u.)

<sup>b</sup>Mean and standard deviation of three independent experiments are shown.

<sup>c</sup>Transduction experiments were performed using 10<sup>9</sup> cells with LIMEstone1 (LS1) and LIMEstone2 (LS2) at an m.o.i. of 0.1.

**Supplementary Table S5: Transduction efficiency of LIMEstone phages**

| Number of cells      | m.o.i. | Transduction efficiency LS1 <sup>a,b</sup> | Standard deviation LS1 <sup>b</sup> | Transduction efficiency LS2 <sup>a,b</sup> | Standard deviation LS2 <sup>b</sup> |
|----------------------|--------|--------------------------------------------|-------------------------------------|--------------------------------------------|-------------------------------------|
| 1 x 10 <sup>10</sup> | 10     | < 1.0 x 10 <sup>-11</sup>                  | -                                   | < 1.0 x 10 <sup>-11</sup>                  | -                                   |
|                      | 1      | 9.9 x 10 <sup>-6</sup>                     | 2.3 x 10 <sup>-6</sup>              | 9.3 x 10 <sup>-6</sup>                     | 1.1 x 10 <sup>-6</sup>              |
|                      | 0.1    | 4.1 x 10 <sup>-5</sup>                     | 1.1 x 10 <sup>-6</sup>              | 7.6 x 10 <sup>-5</sup>                     | 4.5 x 10 <sup>-6</sup>              |
|                      | 0.01   | 7.4 x 10 <sup>-5</sup>                     | 9.9 x 10 <sup>-6</sup>              | 7.5 x 10 <sup>-5</sup>                     | 5.7 x 10 <sup>-6</sup>              |
| 1 x 10 <sup>9</sup>  | 10     | < 1.0 x 10 <sup>-10</sup>                  | -                                   | < 1.0 x 10 <sup>-10</sup>                  | -                                   |
|                      | 1      | 1.1 x 10 <sup>-6</sup>                     | 3.0 x 10 <sup>-7</sup>              | 1.2 x 10 <sup>-6</sup>                     | 2.1 x 10 <sup>-7</sup>              |
|                      | 0.1    | 4.0 x 10 <sup>-5</sup>                     | 2.1 x 10 <sup>-6</sup>              | 6.5 x 10 <sup>-5</sup>                     | 1.4 x 10 <sup>-6</sup>              |
|                      | 0.01   | 7.5 x 10 <sup>-5</sup>                     | 5.3 x 10 <sup>-6</sup>              | 1.3 x 10 <sup>-4</sup>                     | 3.5 x 10 <sup>-6</sup>              |
| 1 x 10 <sup>8</sup>  | 10     | < 1.0 x 10 <sup>-9</sup>                   | -                                   | < 1.0 x 10 <sup>-9</sup>                   | -                                   |
|                      | 1      | < 1.0 x 10 <sup>-8</sup>                   | -                                   | < 1.0 x 10 <sup>-8</sup>                   | -                                   |
|                      | 0.1    | 1.1 x 10 <sup>-6</sup>                     | 3.5 x 10 <sup>-6</sup>              | 1.0 x 10 <sup>-6</sup>                     | 3.2 x 10 <sup>-7</sup>              |
|                      | 0.01   | 9.0 x 10 <sup>-5</sup>                     | 7.1 x 10 <sup>-6</sup>              | 1.4 x 10 <sup>-4</sup>                     | 1.1 x 10 <sup>-5</sup>              |

<sup>a</sup>Transduction efficiency of LIMEstone1 (LS1) and LIMEstone2 (LS2) phages, defined as the number of transductants obtained per p.f.u., of *api*::Tn-KRCPN1 into MK10.

<sup>b</sup>Mean and standard deviation of three independent experiments are shown.

**Supplementary Table S6: Frequency of transduction of different markers using the *Escherichia coli* phage CBA120**

| Donor strain <sup>a</sup> | Relevant marker/plasmid | Recipient strain <sup>a</sup> | m.o.i. | Transduction efficiency <sup>b,c,d</sup> | Standard deviation <sup>c</sup> |
|---------------------------|-------------------------|-------------------------------|--------|------------------------------------------|---------------------------------|
| O157:H7                   | pACYC184                | O157:H7                       | 10     | <1.0 x 10 <sup>-10</sup>                 | -                               |
|                           | pACYC184                | O157:H7                       | 1      | 5.8 x 10 <sup>-5</sup>                   | 9.3 x 10 <sup>-7</sup>          |
|                           | pACYC184                | O157:H7                       | 0.1    | 4.5 x 10 <sup>-5</sup>                   | 1.2 x 10 <sup>-5</sup>          |
|                           | pACYC184                | O157:H7                       | 0.01   | 1.4 x 10 <sup>-4</sup>                   | 1.6 x 10 <sup>-6</sup>          |

<sup>a</sup> *Escherichia coli* O157:H7 NCTC 12900.

<sup>b</sup>Transduction efficiency is expressed as the number of transductants per plaque forming unit (p.f.u.)

<sup>c</sup>Mean and standard deviation of three independent experiments are shown.

<sup>d</sup>Transduction experiments were performed using 10<sup>9</sup> bacterial cells.

**Supplementary Table S7: Frequency of transduction of different markers using the *Dickeya* phages  $\phi$ XF1,  $\phi$ XF3 and  $\phi$ XF4.**

| Donor strain | Relevant marker/plasmid | Recipient strain | m.o.i. | $\phi$ XF1 Transduction efficiency <sup>a,b,c</sup> | $\phi$ XF1 standard deviation <sup>c</sup> | $\phi$ XF3 Transduction efficiency <sup>a,b,c</sup> | $\phi$ XF3 standard deviation <sup>c</sup> | $\phi$ XF4 Transduction efficiency <sup>a,b,c</sup> | $\phi$ XF4 standard deviation <sup>c</sup> |
|--------------|-------------------------|------------------|--------|-----------------------------------------------------|--------------------------------------------|-----------------------------------------------------|--------------------------------------------|-----------------------------------------------------|--------------------------------------------|
| MK10P1       | <i>spp::Km</i>          | MK10             | 10     | $<1.0 \times 10^{-10}$                              | -                                          | $<1.0 \times 10^{-10}$                              | -                                          | $<1.0 \times 10^{-10}$                              | -                                          |
|              | <i>spp::Km</i>          | MK10             | 1      | $2.6 \times 10^{-8}$                                | $5.5 \times 10^{-9}$                       | $1.3 \times 10^{-8}$                                | $4.0 \times 10^{-9}$                       | $1.8 \times 10^{-8}$                                | $6.0 \times 10^{-9}$                       |
|              | <i>spp::Km</i>          | MK10             | 0.1    | $1.1 \times 10^{-6}$                                | $7.0 \times 10^{-8}$                       | $8.5 \times 10^{-7}$                                | $1.3 \times 10^{-8}$                       | $8.3 \times 10^{-7}$                                | $7.3 \times 10^{-8}$                       |
|              | <i>spp::Km</i>          | MK10             | 0.01   | $3.5 \times 10^{-6}$                                | $5.0 \times 10^{-8}$                       | $2.4 \times 10^{-6}$                                | $1.4 \times 10^{-7}$                       | $2.1 \times 10^{-6}$                                | $3.2 \times 10^{-7}$                       |
| MK10P1       | <i>spp::Km</i>          | MK16             | 10     | $<1.0 \times 10^{-10}$                              | -                                          | $<1.0 \times 10^{-10}$                              | -                                          | $<1.0 \times 10^{-10}$                              | -                                          |
|              | <i>spp::Km</i>          | MK16             | 1      | $6.6 \times 10^{-8}$                                | $4.0 \times 10^{-9}$                       | $2.6 \times 10^{-8}$                                | $5.5 \times 10^{-9}$                       | $2.9 \times 10^{-8}$                                | $9.1 \times 10^{-9}$                       |
|              | <i>spp::Km</i>          | MK16             | 0.1    | $9.6 \times 10^{-7}$                                | $1.0 \times 10^{-8}$                       | $1.0 \times 10^{-6}$                                | $5.0 \times 10^{-8}$                       | $1.1 \times 10^{-6}$                                | $9.1 \times 10^{-8}$                       |
|              | <i>spp::Km</i>          | MK16             | 0.01   | $2.6 \times 10^{-6}$                                | $4.5 \times 10^{-7}$                       | $2.0 \times 10^{-6}$                                | $3.2 \times 10^{-7}$                       | $2.0 \times 10^{-6}$                                | $4.1 \times 10^{-7}$                       |
| MK10P1       | <i>spp::Km</i>          | IPO 2222         | 10     | $<1.0 \times 10^{-10}$                              | -                                          | $<1.0 \times 10^{-10}$                              | -                                          | $<1.0 \times 10^{-10}$                              | -                                          |
|              | <i>spp::Km</i>          | IPO 2222         | 1      | $2.6 \times 10^{-8}$                                | $5.5 \times 10^{-9}$                       | $8.2 \times 10^{-9}$                                | $1.8 \times 10^{-9}$                       | $4.6 \times 10^{-9}$                                | $2.7 \times 10^{-9}$                       |
|              | <i>spp::Km</i>          | IPO 2222         | 0.1    | $1.3 \times 10^{-6}$                                | $3.0 \times 10^{-8}$                       | $1.1 \times 10^{-6}$                                | $7.7 \times 10^{-8}$                       | $7.4 \times 10^{-7}$                                | $5.9 \times 10^{-8}$                       |
|              | <i>spp::Km</i>          | IPO 2222         | 0.01   | $2.4 \times 10^{-6}$                                | $2.5 \times 10^{-7}$                       | $2.1 \times 10^{-6}$                                | $5.9 \times 10^{-7}$                       | $1.4 \times 10^{-6}$                                | $1.4 \times 10^{-7}$                       |
| MK10         | pECA1039-km3            | MK10             | 10     | $<1.0 \times 10^{-10}$                              | -                                          | $<1.0 \times 10^{-10}$                              | -                                          | $<1.0 \times 10^{-10}$                              | -                                          |
|              | pECA1039-km3            | MK10             | 1      | $2.0 \times 10^{-8}$                                | $1.3 \times 10^{-9}$                       | $1.4 \times 10^{-8}$                                | $2.3 \times 10^{-9}$                       | $4.1 \times 10^{-9}$                                | $4.6 \times 10^{-10}$                      |
|              | pECA1039-km3            | MK10             | 0.1    | $9.1 \times 10^{-7}$                                | $4.2 \times 10^{-9}$                       | $9.2 \times 10^{-7}$                                | $6.4 \times 10^{-8}$                       | $1.4 \times 10^{-6}$                                | $9.6 \times 10^{-8}$                       |
|              | pECA1039-km3            | MK10             | 0.01   | $2.6 \times 10^{-6}$                                | $4.2 \times 10^{-8}$                       | $2.2 \times 10^{-6}$                                | $2.3 \times 10^{-7}$                       | $1.4 \times 10^{-6}$                                | $2.3 \times 10^{-7}$                       |

<sup>a</sup>Transduction experiments were performed using  $10^9$  bacterial cells.

<sup>b</sup>Transduction efficiency defined as the number of transductants obtained per p.f.u.

<sup>c</sup>Mean and standard deviation of three independent experiments are shown.

**Supplementary Figure S1: Nucleotide sequence alignments of structural and non-structural genes from LIMEstone 1,  $\phi$ XF1,  $\phi$ XF3, and  $\phi$ XF4.** Alignments of DNA polymerase (non-structural) (A) and tail-spike protein (structural) (B) encoding genes are shown. Sequences of the genes encoding the tail-spike protein Orf158 (genome coordinates 119416-120966) and DNA polymerase Orf180 (genome coordinates 141743-142810) of LIMEstone1 (LS1) phage were used for the alignments. Multiple sequence alignments were carried out with ClustalW2 (European Bioinformatics Institute).





XF1 CAATGGATCAAAGACAACACTACCAGCCCGAGACCAATGAGTGGGCGCAGCTTCTGTGCAAC 420  
 XF3 CAATGGATCAAAGACAACACTACCAGCCCGAGACCAATGAGTGGGCGCAGCTTCTGTGCAAC 420  
 XF4 CAATGGATCAAAGACAACACTACCAGCCCGAGACCAATGAGTGGGCGCAGCTTCTGTGCAAC 420  
 LS1 CAATGGATTAAGGACAACACTATCAGCCTAAGACCAATGAGTGGGCACAGCTTCTGTGCAAC 420  
 \*\*\*\*\* \*\* \*\*\*\*\* \*\*\*\*\* \*\*\*\*\* \*\*\*\*\* \*\*\*\*\* \*\*\*\*\*

XF1 ACCATGAACGGGTTTCGAGCAGCGCATGGTGTGGGAGCGTGAAGTAATTGCATCAGCCGCC 480  
 XF3 ACCATGAACGGGTTTCGAGCAGCGCATGGTGTGGGAGCGTGAAGTAATTGCATCAGCCGCC 480  
 XF4 ACCATGAACGGGTTTCGAGCAGCGCATGGTGTGGGAGCGTGAAGTAATTGCATCAGCCGCC 480  
 LS1 ACCATGAATGGGTTTCGAGCAGCGCATGGTGTGGGAGCGTGAAGTAATTGCATCATCCGCC 480  
 \*\*\*\*\* \*\*\*\*\* \*\*\*\*\* \*\*\*\*\* \*\*\*\*\* \*\*\*\*\* \*\*\*\*\* \*\*\*\*\*

XF1 GTCTGGCGAGCCAAGAAGATGTACGCCATGGCCGTTTATGACAGTGAGGGCATCAAGTAC 540  
 XF3 GTCTGGCGAGCCAAGAAGATGTACGCCATGGCCGTTTATGACAGTGAGGGCATCAAGTAC 540  
 XF4 GTCTGGCGAGCCAAGAAGATGTACGCCATGGCCGTTTATGACAGTGAGGGCATCAAGTAC 540  
 LS1 GTCTGGCGAGCCAAGAAGATGTATGCGATGGCCGTGTATGACAGCGAGGGCATCAAGTAT 540  
 \*\*\*\*\* \*\*\*\*\* \*\*\*\*\* \*\*\*\*\* \*\*\*\*\* \*\*\*\*\* \*\*\*\*\* \*\*\*\*\*

XF1 GAGAAGTCGAAGATCAAGTTCAAAGGTCTTGAAGCCCGTAAGTCCACCACGCCCGAATGG 600  
 XF3 GAGAAGTCGAAGATCAAGTTCAAAGGTCTTGAAGCCCGTAAGTCCACCACGCCCGAATGG 600  
 XF4 GAGAAGTCGAAGATCAAGTTCAAAGGTCTTGAAGCCCGTAAGTCCACCACGCCCGAATGG 600  
 LS1 GAGAAGCCGAAGATTAATTCAAAGGTCTGGAAGCCCGTAAGTCCACCACACTGAATGG 600  
 \*\*\*\*\* \*\*\*\*\* \*\* \*\*\*\*\* \*\*\*\*\* \*\*\*\*\* \*\*\*\*\* \*\*\*\*\* \*\*\*\*\*

XF1 TGTCGTGACCGTCTTGTTAAGTGCTATGAGCGTATCCTGCTCGGCACCGAAGAGGAAGTG 660  
 XF3 TGTCGTGACCGTCTTGTTAAGTGCTATGAGCGTATCCTGCTCGGCACCGAAGAGGAAGTG 660  
 XF4 TGTCGTGACCGTCTTGTTAAGTGCTATGAGCGTATCCTGCTCGGCACCGAAGAGGAAGTG 660  
 LS1 TGCCGTGAGCGTCTTGTTCAAGTGCTATGAGCGCATCCTGCTCGGCACCGAAGAGGAAGTA 660  
 \*\* \*\*\*\*\* \*\*\*\*\* \*\*\*\*\* \*\*\*\*\* \*\*\*\*\* \*\*\*\*\* \*\*\*\*\* \*\*\*\*\*

XF1 CAGACGCTCATCAGCGGCTACAAAGAGGAGTACATGAAGCTCTCTGTAGACGATATCGCC 720  
 XF3 CAGACGCTCATCAGCGGCTACAAAGAGGAGTACATGAAGCTCTCTGTAGACGATATCGCC 720  
 XF4 CAGACGCTCATCAGCGGCTACAAAGAGGAGTACATGAAGCTCTCTGTAGACGATATCGCC 720  
 LS1 CAGACGCTCATCAGCGGCTACAAAGAGGAGTACATGAAGCTGTCTGTGGATGATATCGCC 720  
 \*\*\*\*\* \*\*\*\*\* \*\*\*\*\* \*\*\*\*\* \*\*\*\*\* \*\* \*\*\*\*\* \*\*\*\*\*

XF1 AAGGCATCCGGCGTGTCCGACATAGAGAAGTGTGTGGCTGCCGACGGCTCGTTCATCTCT 780  
 XF3 AAGGCATCCGGCGTGTCCGACATAGAGAAGTGTGTGGCTGCCGACGGCTCGTTCATCTCT 780  
 XF4 AAGGCATCCGGCGTGTCCGACATAGAGAAGTGTGTGGCTGCCGACGGCTCGTTCATCTCT 780  
 LS1 AAGGCGTCCGGTGTGTCTGACATAGAGAAGTGTGTGGCTCCGACGGTTCGTTCATCTCT 780  
 \*\*\*\*\*  
 XF1 GGTGCTCACTATGCTGCCAAGGCATGTGTGGTTACAACCGCATGGTAGAGAAGAACGAA 840  
 XF3 GGTGCTCACTATGCTGCCAAGGCATGTGTGGTTACAACCGCATGGTAGAGAAGAACGAA 840  
 XF4 GGTGCTCACTATGCTGCCAAGGCATGTGTGGTTACAACCGCATGGTAGAGAAGAACGAA 840  
 LS1 GGCGCTCACTATGCTGCCAAGGCATGTGTGGGATAACAACCGCCTTGTAGAGAAGAACGAA 840  
 \*\* \*\*\*\*\*  
 XF1 GACCTCGGCTTGCCAATGATTGAGTCGGGTGATAAGGTCAACATGGTACTGCTGAAGAAT 900  
 XF3 GACCTCGGCTTGCCAATGATTGAGTCGGGTGATAAGGTCAACATGGTACTGCTGAAGAAT 900  
 XF4 GACCTCGGCTTGCCAATGATTGAGTCGGGTGATAAGGTCAACATGGTACTGCTGAAGAAT 900  
 LS1 GATCTGGGTCTACCGATGATTGAGTCGGCGATAAAGTGCAGATGGTATTGCTGAAACAG 900  
 \*\* \* \* \* \* \*  
 XF1 GGCAACCCGTTTGCCAGAATTACTTCGCATATCCTGAGTTCCTCCCTGAGGAACTGGGT 960  
 XF3 GGCAACCCGTTTGCCAGAATTACTTCGCATATCCTGAGTTCCTCCCTGAGGAACTGGGT 960  
 XF4 GGCAACCCGTTTGCCAGAATTACTTCGCATATCCTGAGTTCCTCCCTGAGGAACTGGGT 960  
 LS1 GGCAACCCGTTTGCCAGAACTACTTTGCATATCCTGAGTTCCTCCCTGAGGAACTGGGT 960  
 \*\*\*\*\*  
 XF1 ATGGGTAAATGGGTGGATTACCATACAGCCTTTGAGAAGTCCTTCATCGACCCGATTGAG 1020  
 XF3 ATGGGTAAATGGGTGGATTACCATACAGCCTTTGAGAAGTCCTTCATCGACCCGATTGAG 1020  
 XF4 ATGGGTAAATGGGTGGATTACCATACAGCCTTTGAGAAGTCCTTCATCGACCCGATTGAG 1020  
 LS1 ATGGGTAAATGGGTGGACTATCACACAGCCTTTGAGAAGTCCTTCATCGACCCGATTGAG 1020  
 \*\*\*\*\*  
 XF1 TCCATCCTTGACGTGGTCGGCTGGTCACACAAGCGCCGTGTGAACCTT 1068  
 XF3 TCCATCCTTGACGTGGTCGGCTGGTCACACAAGCGCCGTGTGAACCTT 1068  
 XF4 TCCATCCTTGACGTGGTCGGCTGGTCACACAAGCGCCGTGTGAACCTT 1068  
 LS1 TCTATCCTCGACGTGGTCGGCTGGTCACACAAGCGCCGTGTGAACCTT 1068  
 \*\* \*\*\*\*\*

# B

XF1 CACGAGTGTATGGTGTCCATTGGGAGTAATATTACGGTGCCGTTTGTATACCGAGAGT 60  
XF3 CACGAGTGTATGGTGTCCATTGGGAGTAATATTACGGTGCCGTTTGTATACCGAGAGT 60  
XF4 CACGAGTGTATGGTGTCCATTGGGAGTAATATTACGGTGCCGTTTGTATACCGAGAGT 60  
LS1 CACGAGTGTATGGTGTCCATTGGGAGTAATATTACGGTGCCGTTTGTATACCGAGAGT 60  
\*\*\*\*\*

XF1 ACCCCCATTTCTGAGAATAGCACTAACAGTGCCACCCCAATTGTAACGACAACAACACG 120  
XF3 ACCCCCATTTCTGAGAATAGCACTAACAGTGCCACCCCAATTGTAACGACAACAACACG 120  
XF4 ACCCCCATTTCTGAGAATAGCACTAACAGTGCCACCCCAATTGTAACGACAACAACACG 120  
LS1 ACCCCCATTTCTGAGAATAGCACTAACAGTGCCACCCCAATTGTAACGACAACAACACG 120  
\*\*\*\*\*

XF1 CCCCGTCGTGTTTGTGACTGAAGACCCGGATGCAGGTAATCCTGGTGTGGTATATCCAA 180  
XF3 CCCCGTCGTGTTTGTGACTGAAGACCCGGATGCAGGTAATCCTGGTGTGGTATATCCAA 180  
XF4 CCCCGTCGTGTTTGTGACTGAAGACCCGGATGCAGGTAATCCTGGTGTGGTATATCCAA 180  
LS1 CCCCGTCGTGTTTGTGACTGAAGACCCGGATGCAGGTAATCCTGGTGTGGTATATCCAA 180  
\*\*\*\*\*

XF1 TTGATCATTCTGGAATTTTACACCCACTGCATTATTGGGATCTACCAACCCATCGACCTG 240  
XF3 TTGATCATTCTGGAATTTTACACCCACTGCATTATTGGGATCTACCAACCCATCGACCTG 240  
XF4 TTGATCATTCTGGAATTTTACACCCACTGCATTATTGGGATCTACCAACCCATCGACCTG 240  
LS1 TTGATCATTCTGGAATTTTACACCCACTGCATTATTGGGATCTACCAACCCATCGACCTG 240  
\*\*\*\*\*

XF1 AGAAACATTTGGATTGATTATCAAGAACCGGTTTGTGAGCCAACCTGGCGCTTGAGCCAA 300  
XF3 AGAAACATTTGGATTGATTATCAAGAACCGGTTTGTGAGCCAACCTGGCGCTTGAGCCAA 300  
XF4 AGAAACATTTGGATTGATTATCAAGAACCGGTTTGTGAGCCAACCTGGCGCTTGAGCCAA 300  
LS1 AGAAACATTTGGATTGATTATCAAGAACCGGTTTGTGAGCCAACCTGGCGCTTGAGCCAA 300  
\*\*\*\*\*

XF1 AAATTGTGTCCACAACTGAACTGACAACCGATAAATGTATGTCCGCCAGAAGTCGGCAC 360  
XF3 AAATTGTGTCCACAACTGAACTGACAACCGATAAATGTATGTCCGCCAGAAGTCGGCAC 360  
XF4 AAATTGTGTCCACAACTGAACTGACAACCGATAAATGTATGTCCGCCAGAAGTCGGCAC 360  
LS1 AAATTGTGTCCACAACTGAACTGACAACCGATAAATGTATGTCCGCCAGAAGTCGGCAC 360  
\*\*\*\*\*

XF1 TCCGTTATACAATGCGATGTTAATATTTTCAAAATCGCAACCGATAAAAATTATTCGTGAA 420  
 XF3 TCCGTTATACAATGCGATGTTAATATTTTCAAAATCGCAACCGATAAAAATTATTCGTGAA 420  
 XF4 TCCGTTATACAATGCGATGTTAATATTTTCAAAATCGCAACCGATAAAAATTATTCGTGAA 420  
 LS1 TCCGTTATACAATGCGATGTTAATATTTTCAAAATCGCAACCGATAAAAATTATTCGTGAA 420  
 \*\*\*\*\*  
 XF1 TGACACGCCATCAAGGAATGACACGCCATAGCTCGCATTTCCAAAAC TACAAGACACATA 480  
 XF3 TGACACGCCATCAAGGAATGACACGCCATAGCTCGCATTTCCAAAAC TACAAGACACATA 480  
 XF4 TGACACGCCATCAAGGAATGACACGCCATAGCTCGCATTTCCAAAAC TACAAGACACATA 480  
 LS1 TGACACGCCATCAAGGAATGACACGCCATAGCTCGCATTTCCAAAAC TACAAGACACATA 480  
 \*\*\*\*\*  
 XF1 GGTTGTAAACCCAAC TTGTGCAACAACAAGCGCACGCCACACATTAACACCAGTACCGGT 540  
 XF3 GGTTGTAAACCCAAC TTGTGCAACAACAAGCGCACGCCACACATTAACACCAGTACCGGT 540  
 XF4 GGTTGTAAACCCAAC TTGTGCAACAACAAGCGCACGCCACACATTAACACCAGTACCGGT 540  
 LS1 GGTTGTAAACCCAAC TTGTGCAACAACAAGCGCACGCCACACATTAACACCAGTACCGGT 540  
 \*\*\*\*\*  
 XF1 TGCATAACAATTGGCGCGCACATTAATTAACGAGCATTTGGACACCGTATTCTAAACTCAG 600  
 XF3 TGCATAACAATTGGCGCGCACATTAATTAACGAGCATTTGGACACCGTATTCTAAACTCAG 600  
 XF4 TGCATAACAATTGGCGCGCACATTAATTAACGAGCATTTGGACACCGTATTCTAAACTCAG 600  
 LS1 TGCATAACAATTGGCGCGCACATTAATTAACGAGCATTTGGACACCGTATTCTAAACTCAG 600  
 \*\*\*\*\*  
 XF1 GGCCACAACATGTTATCACC AATGCTGCTGCTGTTTAGAAACGCCAAATCCTCAAGGCG 660  
 XF3 GGCCACAACATGTTATCACC AATGCTGCTGCTGTTTAGAAACGCCAAATCCTCAAGGCG 660  
 XF4 GGCCACAACATGTTATCACC AATGCTGCTGCTGTTTAGAAACGCCAAATCCTCAAGGCG 660  
 LS1 GGCCACAACATGTTATCACC AATGCTGCTGCTGTTTAGAAACGCCAAATCCTCAAGGCG 660  
 \*\*\*\*\*  
 XF1 TGCCACATTCAAAGGATCCACAAAATTAGTGTTCCCGATTTGACACAAGATCCCAGCGTG 720  
 XF3 TGCCACATTCAAAGGATCCACAAAATTAGTGTTCCCGATTTGACACAAGATCCCAGCGTG 720  
 XF4 TGCCACATTCAAAGGATCCACAAAATTAGTGTTCCCGATTTGACACAAGATCCCAGCGTG 720  
 LS1 TGCCACATTCAAAGGATCCACAAAATTAGTGTTCCCGATTTGACACAAGATCCCAGCGTG 720  
 \*\*\*\*\*

XF1 TGATGAACGAACACTCATCCCTTCCCAAACAAAATCATACCAATCTGCGGTGCGACTTGAT 780

XF3 TGATGAACGAACACTCATCCCTTCCCAAACAAAATCATACCAATCTGCGGTGCGACTTGAT 780

XF4 TGATGAACGAACACTCATCCCTTCCCAAACAAAATCATACCAATCTGCGGTGCGACTTGAT 780

LS1 TGATGAACGAACACTCATCCCTTCCCAAACAAAATCATACCAATCTGCGGTGCGACTTGAT 780

\*\*\*\*\*

XF1 AATTAATTGAGTAACACCTGCAGCTGCGTTAGGAAACCTCAACTCTGTTCTGCTCACGCC 840

XF3 AATTAATTGAGTAACACCTGCAGCTGCGTTAGGAAACCTCAACTCTGTTCTGCTCACGCC 840

XF4 AATTAATTGAGTAACACCTGCAGCTGCGTTAGGAAACCTCAACTCTGTTCTGCTCACGCC 840

LS1 AATTAATTGAGTAACACCTGCAGCTGCGTTAGGAAACCTCAACTCTGTTCTGCTCACGCC 840

\*\*\*\*\*

XF1 CGCACCATATATTTTTATACCAGGCGCATCCATGTTAATGTAACGGGGCTGGAGAAGTT 900

XF3 CGCACCATATATTTTTATACCAGGCGCATCCATGTTAATGTAACGGGGCTGGAGAAGTT 900

XF4 CGCACCATATATTTTTATACCAGGCGCATCCATGTTAATGTAACGGGGCTGGAGAAGTT 900

LS1 CGCACCATATATTTTTATACCAGGCGCATCCATGTTAATGTAACGGGGCTGGAGAAGTT 900

\*\*\*\*\*

XF1 ATACACATGGGGAAGAAATTTATTGGACGACCCTTGATAATGACTCGGTTAACACACG 960

XF3 ATACACATGGGGAAGAAATTTATTGGACGACCCTTGATAATGACTCGGTTAACACACG 960

XF4 ATACACATGGGGAAGAAATTTATTGGACGACCCTTGATAATGACTCGGTTAACACACG 960

LS1 ATACACATGGGGAAGAAATTTATTGGACGACCCTTGATAATGACTCGGTTAACACACG 960

\*\*\*\*\*

XF1 TTGTATTGCATTGTCATAAGTTGTTTCTCCAGAAAATAAATAATCGTCTATAACGAGATC 1020

XF3 TTGTATTGCATTGTCATAAGTTGTTTCTCCAGAAAATAAATAATCGTCTATAACGAGATC 1020

XF4 TTGTATTGCATTGTCATAAGTTGTTTCTCCAGAAAATAAATAATCGTCTATAACGAGATC 1020

LS1 TTGTATTGCATTGTCATAAGTTGTTTCTCCAGAAAATAAATAATCGTCTATAACGAGATC 1020

\*\*\*\*\*

XF1 GCGTGGTTATTAAGTTTGTGGTGCTTATTTAAGAGTAGATAAATCATTTTGCACGTT 1080

XF3 GCGTGGTTATTAAGTTTGTGGTGCTTATTTAAGAGTAGATAAATCATTTTGCACGTT 1080

XF4 GCGTGGTTATTAAGTTTGTGGTGCTTATTTAAGAGTAGATAAATCATTTTGCACGTT 1080

LS1 GCGTGGTTATTAAGTTTGTGGTGCTTATTTAAGAGTAGATAAATCATTTTGCACGTT 1080

\*\*\*\*\*

XF1 TCCATCCGCTGAACCGATAACACCAGCGCCTGCCGAAGTGAACAAATTTTCTCTCAAAGA 1140  
 XF3 TCCATCCGCTGAACCGATAACACCAGCGCCTGCCGAAGTGAACAAATTTTCTCTCAAAGA 1140  
 XF4 TCCATCCGCTGAACCGATAACACCAGCGCCTGCCGAAGTGAACAAATTTTCTCTCAAAGA 1140  
 LS1 TCCATCCGCTGAACCGATAACACCAGCGCCTGCCGAAGTGAACAAATTTTCTCTCAAAGA 1140  
 \*\*\*\*\*  
 XF1 AGGATCATAAATTTTTATCCAAGTGGTAGGAGAAATACCACCACTTGCCTCTGGTGAAGA 1200  
 XF3 AGGATCATAAATTTTTATCCAAGTGGTAGGAGAAATACCACCACTTGCCTCTGGTGAAGA 1200  
 XF4 AGGATCATAAATTTTTATCCAAGTGGTAGGAGAAATACCACCACTTGCCTCTGGTGAAGA 1200  
 LS1 AGGATCATAAATTTTTATCCAAGTGGTAGGAGAAATACCACCACTTGCCTCTGGTGAAGA 1200  
 \*\*\*\*\*  
 XF1 ACCAAGAGGTACAATTTTAGGGAATGTGCCACCCATCGATATTTACCATCATCGTGGGT 1260  
 XF3 ACCAAGAGGTACAATTTTAGGGAATGTGCCACCCATCGATATTTACCATCATCGTGGGT 1260  
 XF4 ACCAAGAGGTACAATTTTAGGGAATGTGCCACCCATCGATATTTACCATCATCGTGGGT 1260  
 LS1 ACCAAGAGGTACAATTTTAGGGAATGTGCCACCCATCGATATTTACCATCATCGTGGGT 1260  
 \*\*\*\*\*  
 XF1 GAGTAATTCATTTTTTACGCCAAGTGTGCCACCAACTGTGAATGTGCCACCAACTGTGAC 1320  
 XF3 GAGTAATTCATTTTTTACGCCAAGTGTGCCACCAACTGTGAATGTGCCACCAACTGTGAC 1320  
 XF4 GAGTAATTCATTTTTTACGCCAAGTGTGCCACCAACTGTGAATGTGCCACCAACTGTGAC 1320  
 LS1 GAGTAATTCATTTTTTACGCCAAGTGTGCCACCAACTGTGAATGTGCCACCAACTGTGAC 1320  
 \*\*\*\*\*  
 XF1 AAATTCACCACGCAAAACAGCCAGTGTCCCAAAATCGACAGTCCCCCATTATGAGTGAG 1380  
 XF3 AAATTCACCACGCAAAACAGCCAGTGTCCCAAAATCGACAGTCCCCCATTATGAGTGAG 1380  
 XF4 AAATTCACCACGCAAAACAGCCAGTGTCCCAAAATCGACAGTCCCCCATTATGAGTGAG 1380  
 LS1 AAATTCACCACGCAAAACAGCCAGTGTCCCAAAATCGACAGTCCCCCATTATGAGTGAG 1380  
 \*\*\*\*\*  
 XF1 AATGGCATTGTGTTAAGGAGATGAAGACGGAGTCGGAAGGTAAGTCGGAAGGTAAAGCATA 1440  
 XF3 AATGGCATTGTGTTAAGGAGATGAAGACGGAGTCGGAAGGTAAGTCGGAAGGTAAAGCATA 1440  
 XF4 AATGGCATTGTGTTAAGGAGATGAAGACGGAGTCGGAAGGTAAGTCGGAAGGTAAAGCATA 1440  
 LS1 AATGGCATTGTGTTAAGGAGATGAAGACGGAGTCGGAAGGTAAGTCGGAAGGTAAAGCATA 1440  
 \*\*\*\*\*

```

XF1          AGAACGCTCTGTGTTCTTATCGTAGATTACTTTATACCCAGATAAAGATACGCCCGCTTT 1500
XF3          AGAACGCTCTGTGTTCTTATCGTAGATTACTTTATACCCAGATAAAGATACGCCCGCTTT 1500
XF4          AGAACGCTCTGTGTTCTTATCGTAGATTACTTTATACCCAGATAAAGATACGCCCGCTTT 1500
LS1          AGAACGCTCTGTGTTCTTATCGTAGATTACTTTATACCCAGATAAAGATACGCCCGCTTT 1500
*****

XF1          GGCATACAATACCTCAGACTTCTTACACCCGAATTTGCGGGCGATGGAATC 1551
XF3          GGCATACAATACCTCAGACTTCTTACACCCGAATTTGCGGGCGATGGAATC 1551
XF4          GGCATACAATACCTCAGACTTCTTACACCCGAATTTGCGGGCGATGGAATC 1551
LS1          GGCATACAATACCTCAGACTTCTTACACCCGAATTTGCGGGCGATGGAATC 1551
*****

```

## Materials and methods

### Bacterial strains, plasmids, phages, culture media and growth conditions.

Bacterial strains and plasmids used in this study are listed in Supplementary Tables 2.

*Salmonella*, *Dickeya* and their derivative strains were routinely grown at 30 °C in Luria Broth (LB; 5 g yeast extract l<sup>-1</sup>, 10 g Bacto tryptone l<sup>-1</sup> and 5 g NaCl l<sup>-1</sup>), Potato Dextrose (24 g potato dextrose broth l<sup>-1</sup>) or minimal medium (0.1%, w/v, (NH<sub>4</sub>)<sub>2</sub>SO<sub>4</sub>, 0.41 mM MgSO<sub>4</sub>, 0.2% (w/v) glucose, 40 mM K<sub>2</sub>HPO<sub>4</sub>, 14.7 mM KH<sub>2</sub>PO<sub>4</sub>, pH 6.9–7.1). *S. Typhi* BRD948 LB broth was supplemented with a mixture of aromatic amino acids (0.01 g para-aminobenzoic acid l<sup>-1</sup>, 0.04 g tryptophan l<sup>-1</sup>, 0.04 g phenylalanine l<sup>-1</sup> and 0.01 g dihydrobenzoic acid l<sup>-1</sup>) and 0.04 g tyrosine l<sup>-1</sup>, as described previously (Bishop *et al.*, 2008). *Escherichia coli* strains were grown at 37 °C in LB. Media for propagation of *E. coli* β2163 were supplemented with 300 μM 2,6-diaminopimelic acid (DAPA). When appropriate, antibiotics were used at the following final concentrations (in μg ml<sup>-1</sup>): kanamycin, 25 (*E. coli* strains) and 50 (*Dickeya* strains); streptomycin, 50; chloramphenicol, 25; tetracycline, 10. Phages were stored at 4 °C in phage buffer (10 mM Tris-HCl pH 7.4, 10 mM MgSO<sub>4</sub>, 0.01% w/v gelatine) over a few drops of NaHCO<sub>3</sub>-saturated chloroform.

**Isolation of novel bacteriophages and phage lysate preparation.** Treated sewage effluent was collected from Milton (Cambridge, United Kingdom). To prepare phage enrichment, a 10 ml sample of the effluent was filter sterilized and added to 10 ml 2X LB broth. Then, 500  $\mu$ L of an overnight culture of *Dickeya solani* MK10 was added to 250 ml flasks and incubated at 30 °C with shaking at 225 rpm. After overnight incubation, 1 ml of the sample enrichment was mixed with 100  $\mu$ L of chloroform and vortexed vigorously for 1 min to kill bacteria. The sample was centrifuge at 16,000 x g for 1 min and 100  $\mu$ L dilution series of the sterilized supernatant was mixed with 200  $\mu$ L of a *D. solani* MK10 overnight culture and 4 mL of top LB-agar (LBA, 0.35% w/v agar) and poured as an overlay onto LBA plates (1.5% w/v agar). Plates were incubated overnight at 30 °C and single phage plaques were picked with a sterile toothpick into 0.2 ml phage buffer and shaken with 20  $\mu$ L of chloroform to kill any bacteria. Phages obtained were plaque-purified three times. High-titre phage lysates were then obtained as described Petty *et al.* (2006). Phages were titrated by serial dilutions in phage buffer and the phage titre determined in plaque-forming units (p.f.u.) per millilitre. Phages  $\phi$ XF1,  $\phi$ XF3,  $\phi$ XF4 and  $\phi$ XF28 were isolated from four independent sewage effluent samples from Milton (Cambridge, UK).

### **Electron microscopy**

High-titre lysates for transmission electron microscopy were obtained as described by Petty *et al.* (2006) using 0.35% (w/v) LB agarose instead of 0.35% (w/v) LB agar overlays. Phage samples were negatively stained by placing the grids in 25  $\mu$ l drops of 2% phosphotungstic acid for 1 min. Phages were examined by transmission electron microscopy, in the Multi-Imaging Centre (Department of Physiology, Development and Neuroscience, University of Cambridge) using a FEI Tecnai G2 transmission electron microscope (FEI, Oregon, USA). The accelerating voltage was 120.0 kV and images were captured with an AMT XR60B digital camera running Deben software.



### **Transposon mutagenesis and isolation of auxotrophic, oocydin A negative and protease negative mutants.**

Random transposon mutagenesis of *Dickeya solani* MK10 and MK16 using Tn-KRCPN1 and mini-Tn5Sm/Sp were performed as follows. In a biparental conjugal mating, 500 µl of overnight cultures of *E. coli* β2163 and *D. solani* were mixed, collected by centrifugation, resuspended in 30 µl of fresh LB, and spotted on an LB agar plate supplemented with 300 µM DAPA. After overnight incubation at 30 °C, cells were scraped off the plate and resuspended in 1 ml of LB. Serial dilutions were plated on LB agar medium containing the appropriate antibiotic, kanamycin and streptomycin for Tn-KRCPN1 and mini-Tn5Sm/Sp, respectively. 2,6-Diaminopimelic acid was not added to the LB agar medium, to allow counterselection of the *E. coli* donor. Auxotrophic, oocydin A negative and protease negative mutants were identified for their inability to grow on M9 glucose minimal medium agar, inhibit *Pythium ultimum* growth in potato dextrose agar and produce haloes when plated onto skimmed milk agar (nutrient broth agar, 10 g of Marvel skimmed milk powder per liter), respectively. Identification of the transposon insertion sites in mutants was determined using random primed PCR following the method described previously (Fineran *et al.*, 2005) and using primers described in supplemental Table S3.

### **Transduction assays**

Phage lysates were prepared on bacterial strains carrying the desired mutation or plasmid. For the transduction assays, an appropriate volume of a high-titre lysate was added to an overnight culture of the recipient strain to give the desired m.o.i. The mixture was incubated at 30 °C (*Dickeya* and *Salmonella*) or 37 °C (*E. coli*) for 1 h, pelleted by centrifugation (4.000 g for 10 min at 4 °C), washed twice with LB to remove remaining phage and 100 µL aliquots of the phage-host mixture were spread on LBA plates containing the appropriate antibiotic. The drug-resistant transductants were restreaked three times to reduce any bacteriophage carry-over. The number of

transductants was determined by co-inheritance of the antibiotic resistance and a secondary phenotype of either anti-*Pythium* activities, protease production or auxotrophy. The transposon insertion sites in the final transductants were confirmed by random primed PCR and sequencing, as described above. In the case of transduction of plasmids, the presence of the plasmids was confirmed by colony PCR in 10 of the final transductants per experiment, using primers listed in supplementary table S3. For the transduction assays, the protocol was optimized for incubation time, temperature, multiplicity of infection (m.o.i.) and number of bacterial cells. During the transduction assays, routine controls for spontaneous resistance to antibiotics were determined by spreading 100 µl of the overnight culture onto LBA plates containing the relevant antibiotic. A 100 µl volume of the high-titre lysate was also spread on non-LBA plates to confirm lysate sterility. Transduction efficiency was defined as the number of transductants obtained per p.f.u.

## References

1. Adriaenssens EM, Van Vaerenbergh J, Vandenheuvel D, Dunon V, Ceysens PJ, De Proft M, Kropinski AM, Noben JP, Maes M, Lavigne R. (2012). T4-related bacteriophage LIMEstone isolates for the control of soft rot on potato caused by 'Dickeya solani'. PLoS One 7: e33227.
2. Bishop A, House D, Perkins T, Baker S, Kingsley RA, Dougan G. (2008). Interaction of *Salmonella enterica* serovar Typhi with cultured epithelial cells: roles of surface structures in adhesion and invasion. Microbiology 154: 1914-1926.
3. Blower TR, Short FL, Rao F, Mizuguchi K, Pei XY, Fineran PC, Luisi BF, Salmond GP. (2012). Identification and classification of bacterial Type III toxin-antitoxin systems encoded in chromosomal and plasmid genomes. Nucleic Acids Res 40: 6158-6173.

4. Chang AC, Cohen SN. (1978). Construction and characterization of amplifiable multicopy DNA cloning vehicles derived from the P15A cryptic miniplasmid. *J Bacteriol* **134**: 1141-1156.
5. de Lorenzo V, Herrero M, Jakubzik U, Timmis KN. (1990). Mini-Tn5 transposon derivatives for insertion mutagenesis, promoter probing, and chromosomal insertion of cloned DNA in gram-negative eubacteria. *J Bacteriol* **172**: 6568-6572.
6. Demarre G, Guérout AM, Matsumoto-Mashimo C, Rowe-Magnus DA, Marlière P, Mazel D. (2005). A new family of mobilizable suicide plasmids based on broad host range R388 plasmid (IncW) and RP4 plasmid (IncPalph) conjugative machineries and their cognate *Escherichia coli* host strains. *Res. Microbiol.* **156**: 245–255.
7. Dennis JJ, Zylstra GJ. (1998). Plasposons. Modular self-cloning minitransposon derivatives for rapid genetic analysis of Gram-negative bacterial genomes. *Appl Environ Microbiol* **64**: 2710–2715.
8. Fineran PC, Everson L, Slater H, Salmond GP. (2005) A GntR family transcriptional regulator (PigT) controls gluconate-mediated repression and defines a new, independent pathway for regulation of the tripyrrole antibiotic, prodigiosin, in *Serratia*. *Microbiology* **151**: 3833–3845.
9. Fineran PC, Blower TR, Foulds IJ, Humphreys DP, Lilley KS, Salmond GP. (2009). The phage abortive infection system, ToxIN, functions as a protein-RNA toxin-antitoxin pair. *Proc Natl Acad Sci USA* **106**: 894-899.
10. Kutter EM, Skutt-Kakaria K, Blasdel B, El-Shibiny A, Castano A, Bryan D, Kropinski AM, Villegas A, Ackermann HW, Toribio AL, Pickard D, Anany H, Callaway T, Brabban AD. (2011). Characterization of a Vil-like phage specific to *Escherichia coli* O157:H7. *Virology* **8**: 430.
11. Petty NK, Foulds IJ, Pradel E, Ewbank JJ, Salmond GP. (2006). A generalized transducing phage ( $\phi$ IF3) for the genomically sequenced *Serratia marcescens* strain

Db11: a tool for functional genomics of an opportunistic human pathogen. *Microbiology* **152**: 1701-1708.

**12.** Pickard D, Toribio AL, Petty NK, van Tonder A, Yu L, Goulding D, Barrell B, Rance R, Harris D, Wetter M, Wain J, Choudhary J, Thomson N, Dougan G. (2010). A conserved acetyl esterase domain targets diverse bacteriophages to the Vi capsular receptor of *Salmonella enterica* serovar Typhi. *J Bacteriol* **192**: 5746–5754.

**13.** Pritchard L, Humphris S, Saddler GS, Elphinstone JG, Pirhonen M, Toth IK. (2013). Draft genome sequences of 17 isolates of the plant pathogenic bacterium *Dickeya*. *Genome Announc* **1**: 6.

**14.** Roberts KJ. (2010). Quorum sensing in the mouse intestinal pathogen *Citrobacter rodentium*. Ph.D. thesis. University of Cambridge, Cambridge, UK.
